# Supplementary material for: A New Sail-Backed Styracosternan (Dinosauria: Ornithopoda) from the Early Cretaceous of Morella, Spain
Source: PLoS One. 2015 Dec 16;10(12):e0144167. doi: 10.1371/journal.pone.0144167 (PMC4691198; doi:10.1371/journal.pone.0144167)
Supplement: S2 Supporting Information — (TNT) [file pone.0144167.s002.tnt]

xread
135 70
Lesothosaurus_diagnosticus	00000?0000000000000000??0000000000??0?0000000000000000000000?00?000?00000?0?0000000000??000??00????000000000?000000??000?000000?0??0000
Hypsilophodon_foxii	00000?0000000000000000??0100000000?0000000000000000000001010?010000000000?00000000000100001000000000000000000001000000?00000000?0000010
Rhabdodon_sp	???????000000011000000??0?10????????????????????????1???????????????????????????10000101?????????????????????????????????0?010?????????
Zalmoxes_robustus	10100?0000010011200000??0110011000??00000000?0?0110?1??01100?011111?1001??01001010000101101?110????00?00?????011300????1010010101??001?
Zalmoxes_shqiperorum	1??00?0000211011200000???1??????????????????????????101?11?0?01?111?100???1000?010000101??????0????00101?????01030000??1110010111???01?
Muttaburrasaurus_langdoni	?????????????????????????1??????????????00??12????????1?1?00?0??0???00000?0????0????????101?1?????????00???0???12?0?1????00???1010??010
Tenontosaurus_dossi	1000101??0?0???1000?00??0100101100?0101000000000000000??1010?01??100010?100??0?01??0????10???000000??001??????0??01010?10?0?1?10?0000?0
Tenontosaurus_tilletti	1?00101000000011000000??0100111100????1000??0000000?0?3?1010?01?0100010010001010100001001010000000000??10000100000101111000010101000010
Callovosaurus_leedsi	?????????????????????????????????????????????????????????????????????????????????????????????????????????????????????????00001101????0?
Camptosaurus_valdensis	?????????????????????????????????????????????????????????????????????????????????????????????????????????????????????????0?001?????????
Dryosaurus_altus	101?1????0000011000000??0100111100?0101000000000000?0?0??101011001000000100010101000011010100000000002000000100000000001000001101000100
Dysalotosaurus_lettowvorbecki	1011101010000011000000??0?0011??00?????00000000020?0?00?11?1011??10?0000100?1010100001101010000000000200?????00000000001000001111?00101
Kangnasaurus_coetzeei	??????????????????????????????????????????????????????????????????????????????????????????1?0?0??????????????????????????0??01101?0??10
Elrhazosaurus_nigeriensis	?????????????????????????????????????????????????????????????????????????????????????????????????????????????????????????00001121????0?
Valdosaurus_canaliculatus	??????????????????????????????????????????????????????????????????????????????????????????????0??????????????????0000??2?0000112100?101
Uteodon_aphanoecetes	???????????0?0110??000???????????????????????????????????????????????000100111?01??0011??????001000101000100?00121001??2100010111???000
Camptosaurus_dispar	1011101010100011000000??????1111010????00000010??????0?0???10110000?0000100112101000011210100001000000000?00100021001001000010111000000
Draconyx_loureiroi	??????????????????????????????????????????????????????????????????????????????????????????1?0??????????????0?????????????0?010111????00
Cumnoria_prestwichii	??????????10001???00?????1001?1?0??????0?000010??????0?0????????????0?????0111?01000011210100?0????1??00???????1210???0?1?0???11100?000
Owenodon_hoggii	????????10120010000000??????????????????????????????????????????????????????????10000112???????????????????????????????????????????????
NHMUK_R8676	?????????????????????????????????????????????????????????????????????????????????????????????????????????????????????????1?110131????1?
Iguanacolossus_fortis	???1?????????????????????????????????????10?111????????????1012001??????????????????01?2??1?01?????11????????1002?001?1?????????????0?0
Hippodraco_scutodens	??????????100??11000????0?00???????011???00?111030111?0?210??00?00000???10??????1?00011?10????1?10011100?????????????????????0???01????
Theiophytalia_kerri	?????????????????00000??01001111010011101???1?103011????210??00?0???????????????10??01121?100??????????????????????????????????????0???
Cedrorestes_crichtoni	?????????????????????????????????????????????????????????????????????????????????????????????????????????????100110?????????????????0?0
Planicoxa_venenica	???????????????????????????????????????????????????????????????????????????????????????????????????????0?????101210???????01101?????01?
Osmakasaurus_depressus	????????????????????????????????????????????????????????????????????????????????????????????????????1????????100210?????????????????0??
Dakotadon_lakotaensis	101?10101010?0?10???????????111101101110110011100011??0?????????????0101??0110?11000011210100??????????????????????????????????????0???
Lurdusaurus_arenatus	1???????????????????????01001???0??????????????????????????101200???0101??0001?0??????????????1?100????001?????????111111???1?????1????
Barilium_dawsoni	???????01?1000?110??????????????????????????????????????????????????????????????11??0112???????11??1100?01???12121011?1??00?10131???010
Hypselospinus_fittoni	??????????????????????????????????????????????????????????????????????????????????????????????1????0?10?01?????1?10?111111?110131?0?01?
NHMUK_R1831	???????0111000200000????????????????????????????????????????????????????????????11000112??????1????????0011????????11??????11???1??????
Lanzhousaurus_magnidens	???????010100021000000??0100????????????????????????????????????????????????????11000110??1?0?1?100????????????????11?1????????????????
Fukuisaurus_tetoriensis	00111110101?10302010110001201111011????0?1??113??????0?011?1012?0???????????????11?0011210102???101????????????????????????????????0???
Kukufeldia_tilgatensis	???????0111000?1000?1100????????????????????????????????????????????????????????110?0112???????????????????????????????????????????????
Iguanodon_bernissartensis	1111101011100031101011000?0011110110111?11??122032112?0?1101012?00000101100???111100011210100111101121000111110132011111111110131010010
Mantellisaurus_atherfieldensis	1111101011100031111011000?00111101101111111012203211102111010102000001011?00???11100011210100111100011000111110031011112101110131010010
NHMUK_R3741	????????????????????????????????????????????????????????????????????????????????????01?2????????1??0?100?????10131011112111?10??101?0??
Delapparentia_turolensis	?????????????????????????????????????????????????????????????????????????????????????????????11???????0??????1202?011???????????????0??
Ouranosaurus_nigeriensis	21?110111110003201100???010011120111101??112122032011031310101000020011111000210110001121010011?1?1121000111?1013101111111?110131011010
Altirhinus_kurzanovi	1110111?11?0?03110111110010011110??1101111??12313001102?3101010?00??0???????????1100011210102???1001210001111?0031011112?0?????????00??
Jinzhousaurus_yangi	1?0?1?1?11?0???1011?11??0?001?1????1111?10??1231?2111?2?310101???0011???????????11?0011?101021111111110001111??0310?1??11??11?131???01?
Jintasaurus_meniscus	????????????????????????????????????????????????????2????????????001010?100?1??0???????????????????????????????????????????????????????
Equijubus_normani	??11111011?0???1111?1110022011110110111?11??123102111?2?3101010?00??0???1001???11100011210102?1?111??10????????13?0????????1?0131??000?
Penelopognathus_weishampeli	???????01010013101111100????????????????????????????????????????????????????????110?0112???????????????????????????????????????????????
Ratchasimasaurus_suranareae	???????011000030?011011????????????????????????????????????????????????????????????????????????????????????????????????????????????????
Xuwulong_yueluni	111?111011?0???1011?11??022011110110101?101?113102011?2?31010?1?000101??10?1???01?00011210102?11?????????????100310111111??????????1???
Probactrosaurus_mazongshanensis	???????????????????????????????????????????????????????????1???????????11??????0?1??01?3??1?3?1????0110????????????11????1?1?0131??????
Probactrosaurus_gobiensis	11?111101110013111?111100?201?110??1??1??1??12???????0?13101011?00010???100?????121111131?103?1?100021000111?1003101111110?110131110010
Eolambia_caroljonesa	11?111101110013211111100022011110111??111110123??????03131?1011200010101110012101211111[4 5]10103?1?101021000111?10031011112111110131120010
Jeyawati_rugoculus	1??????01110013111111100??????1??????????021123????????????111020???????????????121?11131?103?1????????????????????????????????????????
Protohadros_byrdi	11111?11111001321111110002201111011???111010123????1?0313101102?0???0????????????2??11141?103??????????????1???????????????????????0???
Glishades_ericksoni	????????????????????????????11??012???1????????????????????????????????????????????????????????????????????????????????????????????1???
Shuangmiaosaurus_gilmorei	???????1112011311011?11????????????11??111??13313???????????????????????????????????????11113??????????????????????????????????????????
Nanyangosaurus_zhugeii	???????????????????????????????????????????????????????????????????????????????????????????????????????11?11???????????111?110131?2???0
Bactrosaurus_johnsoni	1111121011201131101111101?201112012???11101013310201113131?1110200010100110002111211111[3 4]1111311?11001111??1??00142011112111210141121010
Gilmoreosaurus_mongoliensis	11?111101??0???11??????????????????????1?022133102???13????11?020????????????????????1??1?103?1????11111?????00142011??211121?13?11?000
Levnesovia_transoxiana	1??11?10110001?11?1?????1??0?????????????0??133????11131?1?110??0001010010000211?2??11?4??113??????????????????????11?????????131?2????
Tanius_sinensis	????????????????????????????????????????????????????113??1?11?2??00101001?000111?????????????11????12111?????001410??????1?21?141?2?01?
Tethyshadros_insularis	??1?111??0?0???110??21??12?111120131111?00??133102111?3?4101100?000?0???10??????12?111141?1131?111?10??01?111?005101111121????????2?0??
Telmatosaurus_transsylvanicus	???????111201131111121101?211112012???111012133????????????11?221??201??1?000?1112??112511113??????????????????????????????????????0???
Claosaurus_agilis	?????????????1??????????????????????????????13??????????????????????????????????12??11251?113?1?1??1?11???????00420?????21?21?1??1??010
Lophorhothon_atopus	????????????????????????????????????11???0?????????1??3??????????00?011?110??????2??11?3??113?1????????????1???????????22?????????2????
Hadrosaurus_foulkii	?????????????????????????????????????????????????????????????????????????????????2??11?5??113??????????0??????025?0????0?112101411??010
Edmontosaurus_annectens	2111121111201141111121111221111211211111102213310211214?3101102210221111111002111222112511113111110121111?11110253011112211210141121010
Corythosaurus_casuarius	2111121?1120114111112111122111121121111?10??133102112?4?3101101?10221111111?0210122211251?113111111121111?11100253011112111210141121010
Proa_valdearinnoensis	001110101012004110111110??2111110111??100112112?????1??????10?200001010010000111000011210100????????????????10142001????1111?141??001??
CMPMS_03	???????????????????????????????????????????????????????????????????????????????????????????????????????????????0310?1??20??????????????
Bolong_yixianensis	??1?111?11?0?031?1?000?1????11101??1111?10??12203011??0???????1?1???????????????1110011210100010???1100001111????10????210????1???2????
Koshisaurus_katsuyama	???????????????????????????????????????00112112?????????????????????????????????????011?10102????????????????????????????1????131??????
;
