# Supplementary material for: A New Sail-Backed Styracosternan (Dinosauria: Ornithopoda) from the Early Cretaceous of Morella, Spain
Source: PLoS One. 2015 Dec 16;10(12):e0144167. doi: 10.1371/journal.pone.0144167 (PMC4691198; doi:10.1371/journal.pone.0144167)
Supplement: S3 Supporting Information — (TNT) [file pone.0144167.s003.tnt]

xread
105 28
Lesothosaurus_diagnosticus	000000001000000000000000000000000000000000000000000000000000000000000000000000000000000000000000000000000
Hypsilophodon_foxii	1000000001000101010000?0101120000000?00000000000000000101000011111010000010000000000000000001000010000000
Rhabdodontids	100100000101010101000?11?1112?00?10?100001120010000100111111011111111001?10010?????????1001111111000010?0
Tenontosaurs	110001000101010101??0?10111120100110111011000010000000101111011111011001110011000000001000302100210101000
Dryosaurids	01010101110010?010000000000011000100001010100000000000101111012211020000000000?0000?00?000102011120002010
Camptosaurus_dispar	01011101110000?0?0001000000??1000110001111100010000000111112012211120001101010110100101000102011120001000
Mantellisaurus_atherfieldensis	011111021200101010011000000011000112011111111111110100111212112211121111101111121110111101103102120113111
Iguanodon_bernissartensis	011111021200101010011000000011100112011111111111110100111212112211121111101111121110111112103111120113111
Ouranosaurus_nigeriensis	02111111120000102011100000001100011101111211212001000011121211221112111210111112111011100111411112?1131??
Altirhinus_kurzanovi	0111110113100010200110000000110001110?1?1111121111000121121211221112?????0111112?11011100111310102?11???1
Eolambia_caroljonesa	?111110???????102011100000001?00?11?01?1??1?102101000121121211231122??11??111113?11011?101113?111211131?1
Jinzhousaurus_yangi	0111110213101010?0001?000000110?01220?1?11111110?10000?112?20122111211?1101111121110111?01112?0112?1131??
Hypselospinus_fittoni	????????????????????????????????????????????111001???0?1121211221112?1131?111112111011?0011031111201131?1
Barilium_dawsoni	??????????????????????????????????????????????1111???0?1121211221112?1?11?11111211101??101013111?201131?1
Equijubus_normani	0111110113101010?0001?0100001110?111011?11111111?1010121121211221112111??0?1??????1????0011??11??????????
Probactrosaurus_gobiensis	011111011?1?1010?00?1001?00?1?00?11?011?1111121111010121121211231122?111?0122213?12011?001113111120113121
Bactrosaurus_johnsoni	011111011310?01020111100000?21001111011112111112121111222222122322221111?01222?422212??003123111121223122
Tethyshadros_insularis	01111102131010?0?0100?0100022?0001110?1?11111111111111??2222?2232?2311?11012222422212?100422311202?2??121
Parasaurolophus_walkeri	0111110213100010202211000002210112222111121?2212121112222323123422231121102222242221211014224111121224122
Saurolophus_osborni	0311111213101010202211010002211112222111121?2012121112222323123422231121102222242221211014224102021224122
Edmontosaurus_regalis	0311111213100010202211010002211111102111121?2012121012222323123422231121102222242221211014224102021224122
Telmatosaurus_transsylvanicus	?111110??31?1??0??011????0022?10?112011???1??011121102222323211322221111??2?2?????????????????????12141??
Bolong_yixianensis	011111021?101010?00???0?????????0???0?11111?11?001???0211212112211121??1?01?1112111111110322??1112?11?1?1
Proa_valdearinnoensis	?111110??200????20?0????000?2?10?11??11?1011111111???021121211221112???????????????????1031121????01141??
Gilmoreosaurus_mongoliensis	?1??1????31?1??02012110??0022?10????0???11?1111??2????22221322142?12?121??2?22?42?1????0132231111212231?1
Batyrosaurus_rozhdestvenskyi	???????????0?????00110???00?1?0??11??1?11111?010010100?1121211221012??1????2???????011???????????????????
Levnesovia_transoxiana	0???????????????1?12?1??????2?000110?11112111111011????1222212221112?1?1?????2???????????1??3????????3??2
Morellaodon	??????????????????????????????????????????????????????????????22???????1???????????????00110??0222???????
;


proc /;
comments 0
;
